# Supplementary material for: Secondary Evolution of a Self-Incompatibility Locus in the Brassicaceae Genus Leavenworthia
Source: PubMed Central journal article supplement (PMC3653793; doi:10.1371/journal.pbio.1001560), 2013-05-14
Supplement: pbio.1001560.s002.pdf [file pbio.1001560.s002.pdf]

Consensus MXXXXXXXXXXXXXXXXXXXXXXXXXXXXXXXXXXXXXXXXXXXXXXXXXXXXXXXXXXXXXJXSXXXXFEXGXFXXXXXXXXXXXXXXWYLGXWX  
1. La\_Lal2\_a1-1 . TT-LNNSY-----TFFQLFLLLVSPGVLSINGFSLTARESVKLSYKRSIV . PGEI . . L . L . KAA TRWTDMDG . . . . I . Y  
2. La\_Lal2\_a2 . TT-HNNSY-----TFFPLFLLLVISIFLRMSINGFSLTARESVKLSYEDTRNIV . PGEI . . M . L . KAATS L T D I D G . . . . I . Y  
3. La\_Lal2\_a4 . MT-DNNSY-----TFFPLFLLLVSPFVLSKINGFSLTARESPVKLSYEDKRSII . PDEI . . L . L . K - A T R L S G I D G . . . . I . Y  
4. Al\_Lal2 . TM TRSVPHGHNHYFTS FFFVFLQVLVLI PSIASYDSTFSPTRLRITEN-ETIV . PEGI . . L . F . K P A T R F Q E R D R . . . . I . Y  
5. Carubv10025960m MNLGEDKGTIV . PGKI . . L . L . K G T T S V P Y I D R . . . . I . Y  
6. Bra010990 MFRRLSFLVFIFTSVLSFEVW-----FSEN-ERIV . PSSI . . L . L . K D R T - - - - - G . . . . I . F  
7. Al\_SRK14 . RGVIPKYH--QSHNFFVFVSTLFLPALSIYANTLLSTESLTIASN-QTIV . LGDD . . L . F . K P A A S L R D G D R . . . . I . Y  
8. Ah\_SRK28 . RGA V P N Y H - - H F H N F F F L F V S V L F C P A F S I F A N T L S S T E S L T I A S N - Q T I V . L G D D . . L . F . R P A A S L R E G D R . . . . I . Y  
9. Al\_SRK01 . R G - V R S I Y H H S I T L C F F A V L V V L I L F C C A F S I H A N T L S S T E S L T I S R N - L T I V . P G K I . . L . F . K P S T R P - - - - - R . . . . I . Y  
10. Al\_SRK25 . R G E V P N K H - - - H S Y T F F V L F P A L V L P D F S I S A N T L S A T E S L T I S S N - K T I V . P G G V . . L . F . K I L - - - - - G D S . . . . I . Y  
11. Ah\_SRK13 . R A - L P N N H - - - - - H F Y I L V I F F L L R S A L P I N V N T L S S T E S L T I S S N - R T I V . L G D V . . L . F . N P T P S S R D G D R . . . . I . Y  
12. Ah\_SRK43 . R G - F R N I Y R H S T F S F L L V F V L I L F F P A F S S T V N T L S A T E S L T I S S N - R T I V . P N D V . . L . F . K P G T S S - - - - - R . . . . I . Y  
13. Bo\_SRK12 . K G - V R N I Y - H H S Y S S F L L V F V V T I L F H P A L S I Y I N T L S S T E S L T I S S N - R T L V . P G D V . . L . F . E T N S - - - - - R . . . . M . Y  
14. Br\_SRK14 . K G - Q N S Y - - - - - T F C F L L V F V V L I L V H P A L S I Y F N I L S S T E S L T I S G N - R T L V . P G D V . . L . F . R T S S S - - - - - R . . . . I . Y  
15. Br\_SRK60 . K G - V H N I Y H H S Y T F S F L L V F L A L I L F H P A L S T Y V N T M S S A S E S L T I S S N - R T L V . P G G V . . L . F . K P S G R S - - - - - R . . . . I . Y  
16. At\_ARK1 . R S - V P N Y H - - - - - H S F F I F L I L L F L - A F S V S P N T L S A S E S L T I S S N - K T I I . P S Q I . . L . F . N P A S S S - - - - - R . . . . I . Y  
17. At\_ARK3 . R G - L P N F Y - - - - - H S Y T F F F F L L I L F P A Y S I S A N T L S A S E S L T I S S N - N T I V . P G N V . . L . F . K P G L D S - - - - - R . . . . I . Y

signal peptide B-lectin (SM00108)

Consensus XXXXXXXXXXXXXNRXXXXJXXXXXXXXLXXXXXXXXXXJXXXXXXXXXXXXXXXXXXXXXXXXXXXXXXXXXXXXXXXXXXXXXXXXXGNXXXXXXXXXXXXXXXXXXXX  
1. La\_Lal2\_a1-1 KRLPTLV-V . IA . . DYPLSNSTAT . KISNNN--LFLD DDQSG L P V . N T N V I N Q - I N I E E P S V A E . L D N . . F V L R Y S N S K - - - S  
2. La\_Lal2\_a2 KQLP-RIVV . IA . . DS H L S N S T A T . K M S N T N - - L F L H D D Q S G R T V . N T N L I N Q I N E - - E T L V A E . L D N . . F V L K Y S N G K - - S  
3. La\_Lal2\_a4 KRLPATV-V . IA . . DHPLSNSTAT . KISNTN--LFLD DEQSG P P V . K T N L I N H I N E - - E P L V A E . L D N . . F V L R Y S N R K - - S  
4. Al\_Lal2 KRFTTRV-V . IA . . DDPLSSSIGT . KV D N S N - - I I L L D - Q S G G V A . T S L T K N M I N - N Q L L V A K . L D N . . F V L R F S N S S - - S  
5. Carubv10025960m KRFP E A V - V . V A . . D N H L H N S T A T . I F S S S S T L K I Q V D - Q S G G V V . T S Q L - R N R I N - N Q R I V P E . L D N . . F V F R E Q L A A - - - G  
6. Bra010990 RQFPGRV-V . TG . . GS P L Y S S E G K . Q I S S S A G - I Q L F D - E S G Y M T . H R D L T S P A E D D A P L S A Y . S D T . . F I V S N Y G - - - G  
7. Al\_SRK14 K T I S R T Y V . V A . . D H P L Y S S A G T . K I S G I N - L V L L N - Q S N I A V . S T N L T G A - V R - - S P V A E . L P N . . F V L R Y S K T N G Q D I  
8. Ah\_SRK28 K T I S V R T Y V . V A . . D H P I S S S D G T . K I S G I N - L V L L N - Q S N I T V . S T N L T G A - V R - - S P V A E . L P N . . F V L R N S K T N G H D V  
9. Al\_SRK01 K K I P E R T Y V . V A . . D T P L S N S V G T . K I S D G N - L V I L D - H S N I P I . S T N - T K G D V R - - S P I V A E . L D T . . L V I R Y F N N N - S Q E  
10. Al\_SRK25 K N V S E K T Y V . V A . . D K P L S N S I G T . K I T N A N - L V L L N - H Y D T P V . S T N L T G A - V R - - S P V A E . H D N . . F V L R D S K T N A S D R  
11. Ah\_SRK13 K E I P K R T Y V . V A . . D N P L S N S T G T . K I S D N N - L V L V D - Q F N T L V . S T N V T G A - V R - - S L V V A E . L A N . . L V L R D S K I N E T D G  
12. Ah\_SRK43 K T I L Q R T Y V . V A . . D K P L I N P I G T . K I S N T N - L V L L D - S D D T L V . S T N L T R D V I - - S P V V A Q . L D N . . F V L R Y S N K D V Q S E  
13. Bo\_SRK12 K K L P Y R T Y I . V A . . D N P L S N S T G T . K I S G N - L V I L G - H S N K S V . S T N L T R G N E R - - S P V V A E . L A N . . F V M R D S N N N D A S K  
14. Br\_SRK54 K K V Y F R T Y V . V A . . D N P L S R S I G T . R I S N M N - L V L L D - H S N K S V . S T N L T R G N E R - - S P V V A E . L A N . . F V M R D S N N N D A S G  
15. Br\_SRK60 K K V S Q K T Y A . V A . . D N P L S N S I G T . K I S G N N - L V L L G - Q S N N T V . S T N L T R E N V R - - S P V I A E . L P N . . F V M R Y S N N K D S S G  
16. At\_ARK1 K I I P I R T Y V . V A . . D N P L S S S N G T . K I S G N N - L V I F D - Q S D R P V . S T N I T G G D V R - - S P V A A E . L D N . . F L L R D S N N R - - - -  
17. At\_ARK3 K A I S K R T Y V . V A . . D T P L S S S I G T . K I S D S N - L V L V D - Q S D T P V . S T N L T G G D V R - - S P L V A E . L D N . . F V L R D S K N S A P D G

B-lectin (SM00108)

B-lectin Pfam (PF01453)

Consensus XXXXSFXXXPXBXLJXXMXJGXXXXXXXXXXXXXXXXXXXXXXXXXXXXXXXXXXXXXXXXXXXXXXXXXXXXXXXXXXXXX  
1. La\_Lal2\_a1-1 FQ . Q . . D Y . T D F . L P G . K L . W D R T K N L N K T - L T W A S L T E P T S G S Y V F A I E N W - T V S H G L L Y S N - - - - G Q L E F . T G - P L Y - - -  
2. La\_Lal2\_a2 S L . Q . . D Y . T D T . L P G . K L . L D R T K N L N K T - L T A W A S L Y D P S S G S Y V F K I E N W - K V S H G L L Y D T - - - - G Q I D S . T G - P S Y - - -  
3. La\_Lal2\_a4 F L . Q . . D Y . T D T . L P G . K L . W D R T K N L N K T - L T W A S L Y D P S S G N Y D F E I E N W - K V S H G L I T N T - - - - G Q P E F . T D - L S Y - - -  
4. Al\_Lal2 Y L . Q . . D F . T D T . L P G . K L . W D R R T N H T K S - L I S W N S D D P S S G R Y V Y K I D T L - K P S Q G L I I F G - - - - D D L P V S . P G - P S Y - - -  
5. Carubv10025960m F L . E . . D S . T D T . L P G . K L . W D R R T N V N T T S L R S W K S L Y D P S Y G D Y K F Q V E I W - E L S Q G F I W K N - E D M Y L Q S . I G L S N H - - -  
6. Bra010990 I L . G . . D Y . S N V . I P G . V L . Y Y P G L D Y I R T - I T - Y D D I F H E G G T E T G Y E H Y I W - G S S - - - - - - - - - - G T K I C . I D - P I Y T T K  
7. Al\_SRK14 L L . Q . . D Y . T D T . L P H . K L . L D L K T G N N R L - L T S W K S F D P S S G Y I S Y K L E T L - G L P E F F M W R N - - - - E V P I F . S G - P W D G T R  
8. Ah\_SRK28 F M . Q . . D N . T D T . L P H . K L . L D L K T G N N R F - L T S W K N A Y D P S S G Y L S Y K L E M Q - G L P E F F M L M R G - - - - G G P V F . S G - P W D G I R  
9. Al\_SRK01 F L . Q . . D F . T D T . L P E . K L . W D R K T G F N R F - L R S Y K S S N D P T S G S F S Y K L E T G - V Y E F F M L A K - - - - E S P V Y . T G - P W N G I Q  
10. Al\_SRK25 F L . Q . . D F . T M T . L P Q . K L . W D H K R G L N R F - L T C W K N S F D P S S G D Y M F R L D T Q - G L P E F F G L K N - - - - F L E V Y . T G - P W D G H R  
11. Ah\_SRK13 F L . Q . . D F . T D T . L P E . K L . W D L K T G V N R F - L R S W K S P D D P S S G D F S Y K L E T R - E F P E F F L S W S - - - - N S P V Y . S G - P W E G F R  
12. Ah\_SRK43 F L . Q . . D Y . T D T . L P Q . K I . L D R K T E F N R F - L R S W R S A D D P A S G D Y S F K L E T R - G V P E F F L V W K - - - - Q N T R M Y . S G - P W N G I R  
13. Bo\_SRK12 F S . Q . . D Y . T D T . L P E . K L . Y N L K K G L N R F - L V S W R S D D P S S G D Y S Y K L E P R - R L P E F Y L L Q G - - - - D V R E H . S G - P W N G I R  
14. Br\_SRK54 F L . Q . . D F . T D T . L P E . K L . Y D L K T G L N R F - L T A W R N S D D P S S G D Y S Y K L E N R - E L P E F Y L L S - - - - G F Q V H . S G - P W N G V R  
15. Br\_SRK60 F L . Q . . D F . T D T . L P E . K L . Y D F K T G R N R F - L T S W R S Y D D P S S G K F T Y E L D I Q T G L P E F I L I N R F L N Q R V M Q . S G - P W N G I E  
16. At\_ARK1 L L . Q . . D F . T D T . L A E . K L . W D Q K T G F N R I - L R S W K T D D D P S S G E F S T K L E T S - E F P E F Y I C S K - - - - E S I L Y . S G - P W N G M R  
17. At\_ARK3 V L . Q . . D F . T D T . L P E . K L . W D A K T G F N R F - I R S W K S P D D P S S G D F S F K L E T E - G F P E I F L W N R - - - - E S R M Y . S G - P W N G I R

B-lectin (SM00108)

B-lectin Pfam (PF01453)

S\_locus glycop (PF00954)

Consensus XXXXXXXXXXXXXXXXXXXXXXXXXXXXXXXXXXXXXXXXXXXXXXXXXXXXXXXXXXXXXXXXXXXXXXXXXXXXXXXXXXXXXXXXXXXXXXXXXXXXXXXX  
1. La\_Lal2\_a1-1 -----R N I V N I T E T E D E I S H S L N I T P N V S S T L L Q L T T A G T L Q L T E F I - - G G E R H F L F L P L D - R . D F Y N K . G E -  
2. La\_Lal2\_a2 -----S N I V N I T E T E E E I S H S L N I T T N V G S I S L Q M M Y T G S L Q L L E F I - - G G E R H I L F H P P D G - T . D F Y N T . G Y -  
3. La\_Lal2\_a4 -----S L V N I A E T E E E I S H S L N I T T N V S S I S I L Q L T S A G A L R L L T E L I - G G E R K T L F Y P N D - R . D Y N S . G E -  
4. Al\_Lal2 -----R K L F N I T E T D N E I T H S L G I S T E N V - - S L L T L S F L G S L E L M A W - - - T G E W N V V W H P P R N - L . D S Y G A . G Q -  
5. Carubv10025960m -----D R I F N I T E S E E A T C T L A M S S N A S L H S A L R M T F T G S L Q L F - - - - V E R N L V W S I P F D - Q . D V Y D A . G F -  
6. Bra010990 -----A M I Q - - T R T N S Y T Y S L R R N T T T S Y Y A S L K M S D T G F L I W S E W T R R D R K L K D L V A P S D - I . D K Y T T . G S G  
7. Al\_SRK14 L S G I P E M Q R W K D I N I S Y N F T E N K E E V A F T F R V T T P N V - Y S R L I M N S E G F L Q L S R W N P T L S E W N V F W R S S T S - D . N G Y Q S . T P -  
8. Ah\_SRK28 F S G I P E M Q N W K F A Y I V Y N F T E N K E D V A F T Y R V T T P N F - Y A K L T M R F E G F L E L S T W D P D M L E W N V F W V S S T A - D . N I Y M G . T A -  
9. Al\_SRK01 F I G M P E M R K S D - - Y V I Y N F T E N N E E V S L T F L M T S Q N T - Y S R L K L S D K G E F E R F T W I P T S S Q W S L S W S S P K D - Q . D V Y D L . G P -  
10. Al\_SRK25 F S G I P E M Q Q W D - - D I V Y N F T E N S E E V A Y T F R L T D Q L T - Y S R F T I N S V G Q L E R F T W S P T Q Q S E W N M F W S M P H E - E . D V Y G T . G P -  
11. Ah\_SRK13 F S G M P E M Q Q W T - - N I I S N F T E N R E E I A Y T F R D T D Q N I - Y S R L T M S S S Q Y L Q R F K W I S N G E D W N Q H W Y A P K D - R . D M Y K I . G P -  
12. Ah\_SRK43 F S G M P E M L E F D - - Y M V Y N F T E N R E E I V Y T F L M T N H S I - Y S R L T M T P A G Y L Q Q S T W F P T E E E A S - - W V S P N E - Q . D T Y R I . G P -  
13. Bo\_SRK12 F S G I L E D Q K L S - - Y M V Y N F T E N S E E V A Y T F R M T N N S F - Y S R L T L S S T G Y F E R L T W A P S S V I W N V F W S S P A N P Q . D M Y R M . G P -  
14. Br\_SRK54 F S G I P E N Q K L S - - Y M V Y N F T E N S E E V A Y T F R M T N N S F - Y S R L K V S S D G Y L Q R L T L I P I S I A W N L F W S S P V D I R . D M F R V . G P -  
15. Br\_SRK60 F S G I P E V Q G L N - - Y M V Y N F T E N S E E I A Y S F Q M T N Q S I - Y S R L T V S S D Y - T L N R F T R I P P S W G W S L F W S L P T D - V . D S L Y F . G S -  
16. At\_ARK1 F S S V P G T I Q V D - - Y M V Y N F T A S K E E V T Y S Y R I N K T N L - Y S R L Y L N S A G L L Q R L T W F E T T Q S W K Q L W Y S P K D - L . D N Y K V . G N -  
17. At\_ARK3 F S G V P E M Q P E E - - Y M V F N F T T S K E E V T Y S F R I T K S D V - Y S R L S I S S S G L L Q R F T W I E T A Q N W N Q F W Y A P K D - Q . D E Y K E . G V -  
S\_locus glycop (PF00954)

Consensus XXXXXCX... 340 350 360 370 380 390 400 410  
1. La\_Lal2\_a1-1 -NSY.I TNET---.V.IA..QP-----GGQYAVGLTKSKPR.L.KSNLS.-LEKE.KKIRNVKL.D.QY-AIADTKVGLLEE.E  
2. La\_Lal2\_a2 -NTY.NTSSN---.E.I.P..QP-----GGQYAVGLTKSKPR.V.NLQLS.-QERE.KKIRNMKL.D.EY-AIVDTKVGLLEE.E  
3. La\_Lal2\_a4 -NSY.NTSNN---.E.MA..QW-----GGQYAVGLTKSRQI.V.KSOLS.-HEKE.KKIRNMKL.D.EY-AIVDTKVGLLEE.E  
4. Al\_Lal2 -NSY.NIVNEKTK.N.I.Q..QG-----DQQHAWDLLDSEKR.L.KTQLS.DSKAE.KQLKRMDF.D.KT-SIVDTTVGSE.E.R  
5. Carubv10025960m -NSY.AISSSKLH.I.LP..H-----QLPDSKTG.V.RSOLS.PERV.D.TLMNMKL.S.EG-TIVDSRAGIEE.R  
6. Bra010990 TNTY.SMNPLKS-.E.FP..RPQTDSENRQDSYALH--.GH.V.KSPLA.SDDDG.QLLKNMKL.E.DNWTTISYEGVGLLEE.K  
7. Al\_SRK14 -YSY.DTNTTPN-.N.IK..AP-----QNQPEGALDNTNTE.V.KTQLS.-DGDG.FWLRNMKP.D.SG-AIVDKRIGLKE.E  
8. Ah\_SRK28 -NSF.DTNTSPN-.N.IK..EP-----RNPQGGALENRSTE.V.KTQLN.-NGDG.FWLRNMKL.D.SG-AIVDKRIGLKE.E  
9. Al\_SRK01 -YSY.DINTSPI-.H.I.Q..EP-----KFFE-WKLI DVAGG.V.RTPLN.-GKDR.LPLKQMKL.D.KT-VIVDRKIGMKD.K  
10. Al\_SRK25 -YAY.DMSKSPA-.N.IK..QP-----LNQEQWESGDESGR.R.KTRLN.-RGDG.FKLMNMKL.D.TA-AMVDRKIGLKE.E  
11. Ah\_SRK13 -YGI.DTNSSPE-.N.IK..QP-----RNLQEWSLRDSGSKG.V.KTRLS.-SEDA.FWLKNMKL.D.TT-AIVDRRLLGVKE.R  
12. Ah\_SRK43 -YGY.DMITSPI-.N.IK..TP-----RYSEAWKLDGASG.V.KTPVS.NGKDE.VQLKNMKL.D.TS-AVVDKRIGLNE.R  
13. Bo\_SRK12 -YSY.DVNTSPS-.N.I.Q..DP-----RNLQQWALRISLRG.K.RTLLS.-NGDG.TRMKNMKL.E.TM-AIVDRSIGLKE.E  
14. Br\_SRK54 -YAY.DGNTSL-.N.I.Q..DP-----WNLQQWDIGEPAGG.V.RTLLS.-SDDG.TMKMKML.D.RL-AIVDRSIGLKE.E  
15. Br\_SRK60 -YSY.DINTSPV-.N.I.R..VP-----KNRQRWDLRDSHG.V.TTQMS.-SGDG.LRLNMNL.D.KT-ASVDRITDVKK.E  
16. At\_ARK1 -FGY.DSNTSLPN-.Y.IK..KP-----VNEQAWDLRDSAG.M.KTRLS.DGRDG.TRLKRMKL.D.TA-TIVDREIGLKV.K  
17. At\_ARK3 -YGY.DSNTSPV-.N.IK..KP-----RNPQVWGLRDSGSG.V.KTLLS.GGGDG.VRLKMKL.D.TT-ASVDRIGVKE.E  
S locus glycop (PF00954) PAN\_AP (SM00473)

Consensus XXCXXCXCCTXXXXXXXXXXXXXCVXXXXXXXXXXXXXXXXXXXXBLXXXXXXXXXXXXXXXXXXXXXXXXXXXXXIXXXXGXXXXXXXXXX  
1. La\_Lal2\_a1-1 KR.LMN.N..AFANTDMNGGESG..M.TGDLIDV.SYNTDEGQD.YVKLPADDL---RGRKNVNIKT..GSI.I.GLGLGLL-  
2. La\_Lal2\_a2 KR.LMN.N..AFANIDMRNGGSD..M.TGDLIDM.SYNTTEGQD.YVKLPAEDL---GGKKNVNIKT..GSI.I.GLGLGLL-  
3. La\_Lal2\_a4 KR.LKN.N..AFAITDMNGGGSG..M.TGDLIDL.SYMTE-GQD.YVKLPADDL---GGKKNVNIKT..GSI.I.GLGLGLL-  
4. Al\_Lal2 KS.LTN.N..AFANTEW----G..R.TSLLIDL.SYNTTE-GVD.YIKLATADL---G---VNKTAT..GSI.V.GCLLVLVLS  
5. Carubv10025960m AR.ATN.T..AFASTDIRNGESG..M.NGLDLDV.SESSNRGQD.YVKHAPVPL---G---LNRKT..GSTV.GCLLVLVLS  
6. Bra010990 ER.LFT.N..AFANTDMPTGVR.S..M.TVSLDDT.RNR--GQN.YVKLAALDM---GSNQNKKR--.GFTV.AIVLILLI  
7. Al\_SRK14 ER.IKE.N..AFSNMNIQDGGGK..I.TKELADI.RYAD-GQD.YVRLAADVLTTEKANNNSGKTRT..GLSV.AIALIFLS  
8. Ah\_SRK28 ER.IEN.N..AFANTNIQNGGSG..L.TRELADI.RYVDA-GQD.YVRLAADVLTTEKANNNSRKRTRT..GLSV.AIALIFLS  
9. Al\_SRK01 KR.LND.N..AYANTDI---GGTG..M.IGELLDI.NYAVG-SQD.YVRLAASEL---GKEKNINGK--.GLIV.VSVVFLS  
10. Al\_SRK25 KK.KND.N..AYAS--TLNGGRG..I.IGFFRDI.KYAAA-GQD.YIRLAAADI---ERRRNISGK--.ILIV.ISLMVMS  
11. Ah\_SRK13 EK.LND.N..AFANADIR--GSG..I.TGDLVDT.SYPNG-GQD.CVRLAAAEEL---EERNIRGK--.GLCV.ISLIFLFS  
12. Ah\_SRK43 ER.LND.N..AFANINIQNRGSG..V.TRELLDI.NYPAA-GQD.YVKIAAADY---GDERNOR GK--.GLTV.VSLMVLFS  
13. Bo\_SRK12 KR.LSD.N..AFANADIRNGGTG..I.TGNLADM.NYVAD-GQD.YVRLAVADDL---VKKSNANGK--.SLIV.VSVLILLI  
14. Br\_SRK54 KR.LSD.N..AFANADIRNGGTG..I.TGHLDQI.TYYDE-GQD.YVRLAADDL---VKKKNANWK--.SLIV.VSVVLLL  
15. Br\_SRK60 EK.LSD.N..SFATADVRNGGLG..F.TGDLVEI.KQAVV-GQD.YVRLAADDLDFSSGKRDRTGT--.GWSI.VSVMLLFS  
16. At\_ARK1 ER.LED.N..AFANADIRNGGSG..I.TRELLDM.NYAKG-GQD.YVRLAAAEEL---EDKRRIKNEK--.GSSI.VSILLLFS  
17. At\_ARK3 OK.LRD.N..AFANTDIRGSGSG..T.TGELFDI.NYAKG-GQD.YVRLAATDL---EDKRNRSAK--.GSSI.VSVLILLI  
PAN\_AP (SM00473) transmembrane domain

Consensus XXXXXXXXWXXXXXXXXXXXXXXXXXXXXXXXXXXXXXXXXXXXXXXXXXXXXXXXXXXXXXXXXXXXXXXXXXXXXXXXXXA TXXFXXXXXXXXXGXG  
1. La\_Lal2\_a1-1 ---VCY-.LVI TRNRSKTNSPDS---QVFEDWGSICMDYDVIA T..GN.SDSNTL.K.  
2. La\_Lal2\_a2 ---LCY-.LVI TRNRSKSNSQETSQ---TI EDWGSICMDYDVIA T..EN.SDSNTL.K.  
3. La\_Lal2\_a4 I---LCY-.LVI TRNRSKSNSPSITEPP---SSDSKVFEDWGSICMDYDVIA T..EN.SDSNTL.K.  
4. Al\_Lal2 FII-LCL-.IR-RKKRARAIAAANVSQE-RNRDLTI---NTTEDWGSKHMDFDVIST..NH.SELNKL.K.  
5. Carubv10025960m III-LCF-.LK-KKNLAKLNLNLYLGNVSKETNRQDLI---KRDEDWGSKVIDFEVIAA..NN.SDNK.L.K.  
6. Bra010990 VVVTFCCC.KR-YNRTEVDVTPTEP---VSR-SAPEEETGSLTSLPMEFDVIAQ..NN.SD--ET.S.  
7. Al\_SRK14 FTI-FFL-.RRHKKAREIAQYTECGQRV---GR-QNLETDDEDDLKPLPMEYDVVAM..DD.AITNKL.E.  
8. Ah\_SRK28 FTI-FFL-.RKHKKARGIALYTECGQTG---GR-LNLDLTDDEDDLKPLPMEYDVVAM..ND.SISNKL.E.  
9. Al\_SRK01 FIT-PCF-.KW-KQKQARASAAANVNPE-RSPDILMDGMVIPSIDI-HLSTENITDDELLPLPTEFVIVR..NN.SVSNKL.E.  
10. Al\_SRK25 FIM-YCF-.KR-KHKRTRARATASTI-E-RIQGFNTGYQVVSRRRQLFEENKIEDLELPLTEFEAVVI..GN.SESNKL.R.  
11. Ah\_SRK13 FCI-ICF-.KR-KQRLIALAAPVYHHE-RNAELLMNGMVISRRR-RLSGENITEDLELPLVLDVAVM..EN.SNANKV.Q.  
12. Ah\_SRK43 FII-FCL-.KR-KQMLARATATPTVLQE-RNODLMI GVVISRRR-HLSEENITEDLELPSMELKAVVM..EN.SDCNKL.Q.  
13. Bo\_SRK12 M---FCL-.KR-KQNRKESAAASIANRQ-RNQNLMNMGIVLSKR-QLSGENKIELELPLIELEAVK..EN.SNSNKL.Q.  
14. Br\_SRK54 LLIGFCL-.KR-KQNRKAMATSIIVNQ-RNQVLMNMTQTSDKR-QLSRENKAEFELPLIELEAVK..EN.SNCNEL.R.  
15. Br\_SRK60 VIV-FCF-.RR-RQKQAKADATPIVGNQ---VLMNEVVLPKRKIHFSGEDEVENLELSLMEFEAVVT..EH.SDFNKV.K.  
16. At\_ARK1 FVI-FHF-.KR-KQKRSITIQTPNVQV-RSQDSLINDVVVSRG-YTSKESKSEYLELPLLELEALAT..NN.SDNK.L.Q.  
17. At\_ARK3 FII-FFL-.KR-KQKRSILIEETPIVDHQLRSRDLNMEVVISRRR-HISRENNTDLELPLMEFEVAVM..NN.SNANKL.Q.  
transmembrane dom... DUF3660 kinase domain (P...

Consensus GXXXVYKGGXXXGXXXAVKXXXXXXXXXXXXXXXXXXXXXIXXQHXNXXXJXXXXXXXXXXXXXXLYEYXXXXXLSBXXJXXXXX  
1. La\_Lal2\_a1-1 .FGT...QLPD.HKI...KMTADSKGGLTGLGN.INL.AKV..S.LIRLLGFCS TSHPDHNL.V..YVENS..DTYIFDTTG  
2. La\_Lal2\_a2 .FGT...QLPD.QYI...KMTMSQGGVEGFAN.MKL.ARV..S.LIRLLGFCS T--ADHRL.V..YIENS..DTYIFDTTE  
3. La\_Lal2\_a4 .HGT...QLPD.HKI...KMTADSKGGLTGLGN.INL.AKV..S.LIRLLGSCSTRSPDHNL.V..YVENS..DTYIFDTTG  
4. Al\_Lal2 .FGI...RLCD.QEI...RLSKMSPIGVGEFTV.AKL.ALV..V.VIRLIGFCSN--ADEKI.V..FLENS..DTYIFDSTR  
5. Carubv10025960m .FGI...QLSH.QEI...RLSEMTPKGVGEPAN.TKL.AML..T.LVRLVGFCSN--ADEKI.V..FLENS..DRYLFDTTR  
6. Bra010990 .FAK...RLLD.RDI...RLYKLTTHA IQGFAN.VNL.AVL..T.LVRLIGFVDD--PDTKI.V..YLP RS..NTYIYBTR  
7. Al\_SRK14 .FGT...RLID.BEI...KLSDVSTQGTNEFRM.MIL.AKL..I.LVRLGCFAD--ADDKI.V..YLENL..DYIIFDETK  
8. Ah\_SRK28 .FGT...RLID.BEI...KLSDVSTQGTNEFRM.MIL.AKL..I.LVRLGCFAD--EDDKI.V..YLENL..DYIIFDETK  
9. Al\_SRK01 .FGI...RLHN.KEF...RLS DLSHQGSDEFK.VKV.SRL..I.LVRLGSCS--GKEKI.I..YLENS..DRHLPDKTR  
10. Al\_SRK25 .FGM...RLPD.QDT...RLSEVSAQGTTEFFMN.VRL.ARL..I.LVRLS CCIY--ADEKI.I..YLENG..DSHLFKINQ  
11. Ah\_SRK13 .FGI...RLLD.QEI...RLSKTSLQG TNEFKN.VRL.AKL..I.LVRLGSCV--VDEKM.I..YLENL..DSYIFDKNR  
12. Ah\_SRK43 .FGI...RLLD.QEI...RLSETS DQGVHEFKN.LRL.ARL..I.LVRLGSCVD--EGEKM.I..YMNEL..DSHLFDKTR  
13. Bo\_SRK12 .FGI...ILLD.QEI...RLSKTSVQGVDEFMN.VTL.ARL..V.LVQLGSCID--ADEKM.I..YLENL..DYIFGKTR  
14. Br\_SRK54 .FGI...MLD.QEI...RLSKTSLQGDDEFMN.VRL.ARL..I.LVRLGSCIE--ADEKI.I..YLENS..DYFLFGKTR  
15. Br\_SRK60 .FGV...RLVD.QEV...RLSEMSAQGTDEFMN.VRL.AKL..I.LVRLGSCVY--EGEKI.I..YLENL..DSHLFDETR  
16. At\_ARK1 .FGI...RLLD.KEI...RLSKMSSQGTDEFMN.VRL.AKL..I.LVRLGSCVD--GKEKM.I..YLENL..DSHLFQTR  
17. At\_ARK3 .FGI...KLLD.QEM...RLSKTSVQGTDEFKN.VKL.ARL..I.LVRLACCVD--AGEKM.I..YLENL..DSHLFDKSR  
kinase domain (PF00069)

670 680 690 700 710 720 730 740  
Consensus XXXLBWXXRXXIXXGXXXGJXYLHXDSRXXXIHXLKXXNXLXXXXMXPISDFGAXXXXXXXXXXXXXXXXXXGTGXGXXPXX  
1. La\_Lal2\_a1-1 QYA.D.EM.FE.IK.IVR.LI...Q...FRI...L...PN.I...DKD.I.K...L.QLTERNATKGFVETAV..F..IA..EL  
2. La\_Lal2\_a2 QYV.N.EK.FE.IK.IVR.LI...Q...FRI...L...PN.I...DKD.I.K...L.KILEGNATEGRAPTAV..L..I.D.NY  
3. La\_Lal2\_a4 QYV.N.EK.FE.IK.IVR.LI...Q...FRI...L...PN.I...DKK.I.K...L.QLTEGNATIGFARTAV..F..IA..EL  
4. Al\_Lal2 GSV.N.DT.FD.AK.IIR.LV...Q...FRI...L...PS.I...GKD.V.K...M.RILGGDETEAHVTTVT..F..IA..EY  
5. Carubv10025960m GSL.N.EY.MK.TL.IVR.LV...H...FRI...L...PA.V...DKD.S.K...M.KILGGDETEAHVTTVK..F..IA..EY  
6. Bra010990 SDV.D.NK.MD.AK.IAR.LL...Q...VRI...L...LS.V...CDQ.I.R...T.KRLDGEDTEHVASSAT..Y..MA..EY  
7. Al\_SRK14 SSD.N.QT.FN.IN.IAR.LL...K...CKV...R...TS.I...DKD.I.K...L.RIFARDEEEATRRIV..Y..MA..EY  
8. Ah\_SRK28 SSE.N.QT.FN.IN.IAR.LL...K...CKV...R...TS.I...DKD.I.K...L.RIFARDEEEATRRIV..Y..MA..EY  
9. Al\_SRK01 SSN.N.QR.FD.TN.IAR.LL...H...CRI...R...AS.I...DKN.I.K...M.RIFSDDVNEATRIV..Y..MS..EY  
10. Al\_SRK25 SSK.N.QK.FN.IN.IAR.LL...Q...FKI...R...AS.V...DKN.T.K...M.RIFERDETEANTRKVV..Y..MS..EY  
11. Ah\_SRK13 SWK.N.QM.FN.TN.IAR.LL...Q...CRI...R...AS.V...DKD.T.K...M.RIFGRETEANTRKVV..Y..MS..EY  
12. Ah\_SRK43 SCK.N.QM.FD.TT.IAR.LL...Q...CRI...R...AS.V...DKD.T.K...M.RIFGRETEANTRKVV..Y..MS..EY  
13. Bo\_SRK12 RSK.N.KE.FD.TN.VAR.LL...Q...FRI...R...VS.I...DRN.V.K...M.RIFARDETEANTRKVV..Y..MS..EY  
14. Br\_SRK54 SSN.N.KD.FA.TN.VAR.LL...Q...FRI...R...PG.I...DKY.I.K...M.RIFARDETEANTRKVV..Y..MS..EY  
15. Br\_SRK60 SCM.N.QM.FD.IN.IAR.LL...Q...FRI...R...AS.V...DKD.T.K...M.RIFGRETEADTRKVV..Y..MS..EY  
16. At\_ARK1 SSN.N.QK.FD.IN.IAR.LL...Q...CRI...R...AS.V...DKN.T.K...M.RIFGRETEANTRRVV..Y..MS..EY  
17. At\_ARK3 NSK.N.QM.FD.IN.IAR.LL...Q...FRI...R...AS.I...DKY.T.K...M.RIFGRETEANTRKVV..Y..MS..EY  
kinase domain (PF00069)

750 760 770 780 790 800 810 820 830  
Consensus XXXXXXKXKDVXSFVXXXLEXXXXXXXXXXXXXXXXXXXXXXXXXWXXXXXXXXXXXXXXXXXXXXXXXXXXXXXXXXXXXXXZXXXXXXX  
1. La\_Lal2\_a1-1 RNDNVY.V.S..Y...ML..IVSGKKNMEYFKNFDGTSLLRYI.DSWSKGKVLVLEIV.PVLKDDSSLSS---LQEEIIRR.VQI  
2. La\_Lal2\_a2 SKHNIY.A.S..Y...LL..IVSGKRNMDFLNSFDGTSLLTHI.NSWSKGEVLEIV.PVLKIASLTS---LQAEIILK.VHI  
3. La\_Lal2\_a4 RNDNVY.V.S..Y...ML..IVSGKKNMEYFKNFDGTSLLRII.DSWSKGEVLEIV.PVLKDDSSLSS---LQEEIIRR.VQI  
4. Al\_Lal2 RSDGVL.V.S..F...ML..IISGKRNI DFLHLNDGSTLLSYM.NHWSQGNGLVLEIV.PAIKDDSSSSS---QOILR.VQI  
5. Carubv10025960m RNDGT.V.S..F...MV..IVSGKRNI DFLNLDDGSTLLSYI.QRWSEGNGLVLEIV.PAIKDDSSSSV---FP--QVLR.IQI  
6. Bra010990 AIDGVC.V.A..F...LL..MVSGINARFETWYKNDYKSFVGM.NLWLQGGKVLVLEIV.PYFTSSSSSSS---SSYQPEALR.IQI  
7. Al\_SRK14 AMDGVY.E.S..F...VI..IVTGKKNRGTSSDLDLTLNLLSVV.RNMEEGTGKYLK.PNMMDDSSSSQA---FKLDEILR.ITI  
8. Ah\_SRK28 AMDGVY.E.S..F...VI..IVTGKKNRGTSSDLDLTLNLLSVV.RNMEEGTGKYLK.PNMI DSSSSQA---FKLDEILR.ITI  
9. Al\_SRK01 AMDGY.E.S..F...ML..IVTGMKNRGTSSDLDLTLNLLSVV.RNMEEGKGLAVA.PNI DSSSSS---PTFRPDEVLR.IKI  
10. Al\_SRK25 AMDGIF.V.S..F...LV..IISGKRNRGFYNSNDLNLNLLSYT.DNWKEGEGLKIV.PII DSSSSS---SMFRPYEVLRL.IQI  
11. Ah\_SRK13 AMDGVF.M.S..F...LL..IISGKRNRGFYNSNDLNLNLLGCV.RNWTEGKGLVLEIV.PII DSSSSS---VILQEIILK.MQI  
12. Ah\_SRK43 AMDGIF.M.S..F...LL..IISGKRNRGFYNSNGDLNLLGCV.RNWKEGKWTETI.PAI DSSSSSLSDFQPEVLR.IQV  
13. Bo\_SRK12 AMGGIF.E.S..F...MV..IITGKRNRGFY---EDNLLSYA.RNWKGGRALEIV.PVI VNSFSPSSSTFQLQEVVLK.IQI  
14. Br\_SRK54 AMYGV.I.E.T..F...IV..IVIGKRNRGFYQVNPENNLPSYA.THWAEGRALVLEIV.PVIL DSSLSLSPSTFKPKVVLK.IQI  
15. Br\_SRK60 AMNGTF.M.S..F...LL..IISGKRNRGFCDSDSNLNLNLLGCV.RNWKEGQGLVLEIV.RVI DSSSPT---FRPREILR.IQI  
16. At\_ARK1 AMDGIF.M.S..F...LL..IISGKRNRGFYNSNRDLNLLGCV.RHWKEGNELEIV.PINI DSSSK---FPTHEILR.IQI  
17. At\_ARK3 AMDGIF.M.S..F...LL..IISGKRNRGFYNSDRDLNLLGCV.RNWKEGKGLVLEIV.PII DSSST---FRQHEILR.IQI  
kinase domain (PF00069)

840 850 860 870 880 890 900 904  
Consensus XLXCXXXXXEXRPMXXXXXXXXLXXXXXXXXXXXXXXXXXXXXXXXXXXXXXXXXXXXXXXXXXXXXXXXXXXXXXXXXXXXXX\*  
1. La\_Lal2\_a1-1 G.L.VHESP.D..T.TLILSL.GKEVDFIDRPPK.-----AETEW TG IKG EAS TS . APPIAST-MGA..  
2. La\_Lal2\_a2 G.L.VHELP.D..T.SLVGSL.GKEVDFIDRPPK.-----AEIGSKEAKGEASTV.SPQITFS-MDA..  
3. La\_Lal2\_a4 G.L.VHESP.D..T.TLVLSL.GKEVDFIDRPPK.-----AETEW TG IKG EAS TS . APPIG T-MGA..  
4. Al\_Lal2 G.M.VQELP.D..T.SSVGLM.GRETEAIPQPKS.-----VETGSSSGGQQ-ESESG.VPEITLF-IEG..  
5. Carubv10025960m G.L.VQPLP.D..T.SAVGLM.AREA E V I P L P R S . -----VEIGSSSRGGQEESVSG.VPDI T M F - I E C .  
6. Bra010990 G.L.VQHR.D..P.ASII LM.GSQNELISLPPK.ADLL---LLQDP-----QGESF.ASVATG\*  
7. Al\_SRK14 G.T.VQEYA.D..M.SWVSM.GSNTD-I PKPK.GYCLA---ISSDPWTS-----TIEYTTTEVEP..  
8. Ah\_SRK28 G.T.VQEYA.D..M.SWVSM.GSNTD-I PKPK.GYCLA---ISSDPWTS-----TIEYTTTEVEP..  
9. Al\_SRK01 A.L.VQEYA.D..T.LSVVSM.GSETAEIPKAKA.GYCVGRSLHDTDFSSS-----LTW.FG-FAFSDIEP..  
10. Al\_SRK25 G.L.VQERA.D..K.SSVVLM.GSEKGDIPQPK.GYCVGRSLET DSSS TQR-GDESL.VNQITL SV I D A .  
11. Ah\_SRK13 G.L.VQERA.D..R.SSVVAM.GSETAVIPQPK.GYCVGRSLET DSSR SK QH - D D E S W . V N E I T L S V I D A .  
12. Ah\_SRK43 G.L.VQERA.E..T.SSVVVM.GSETAAIPHPKP.GYCVGRNLET V S S S S --- D E S C . V N Q I T I S I M D A .  
13. Bo\_SRK12 G.L.VQELA.N..T.SSVVVM.GNEATEIPQPKS.G-CVKRS.PYELDPSSSRQRDDDES.W.VNQITCSVIDA..  
14. Br\_SRK54 G.L.VQERA.H..T.SSVVVM.GSEATEIPQPK.VYCLIAS.YYANNPSSSRQFDDDES.W.VNKYTCSVIDA..  
15. Br\_SRK60 G.L.VQERV.D..M.SSVVLM.GSETALIPQPK.GYCVSOSLETYSSWSKLR-DDENW.VNQITMSIDA..  
16. At\_ARK1 G.L.VQERA.D..V.SSVVM.GSETAIPQPK.GPCIGRSPLEADSSSSTQR-DDEC-.VNQITL SV I D A .  
17. At\_ARK3 G.L.VQERA.D..T.SLVILM.GSESTTIQPKA.GYCLERSLDT DSSS SK Q R - D D E S W . V N Q I T V S V L D A .  
kinase domain (PF00069) DUF3403 (PF11883)
