# Supplementary material for: Secondary Evolution of a Self-Incompatibility Locus in the Brassicaceae Genus Leavenworthia
Source: PubMed Central journal article supplement (PMC3653793; doi:10.1371/journal.pbio.1001560), 2013-05-14
Supplement: pbio.1001560.s004.pdf [file pbio.1001560.s004.pdf]

Identity

a4\_ARK3-PUB8 TGTTATGATGCTCGGAAACGAAACAACAAGAATTCCTCAGCCTAAACCGCCAGGTTATTGCGTGGAAGAAAGTCCATCATGACACTGATTATCATATCAGAG-TAAGC  
a1-1\_ARK3-PUB8 TGTTATGATGCTCGGAAACGAAACAACAAGAATTCCTCAGCCTAAACCGCCAGGTTATTGCGTGGAAGAAAGTCCATCATGACACTGATTATCATATCAGAGCTAAGC

Identity

a4\_ARK3-PUB8 CACG-TTATGATGAACCTTGGACAGTGAACCAAAATCACTATCTCGGTCCTTGACGCTAGGTAATGTGAGTACTTCTCCATAGCAAATATAGATGGTTCAAAT  
a1-1\_ARK3-PUB8 CACGTTTATGATGAACCTTGGACAGTGAACCAAAATCACTATCTCGGTCCTTGACGCTAGGTAATGTGAGTACTTCTCCATAGCAAATATAGATGGTTCAAAT

Identity

a4\_ARK3-PUB8 GTCTTAAATTAACCTGTTATTATGTAATTGTTTATTGAGACAACCTTGTAATAGATCTGCAACAACAATGATTGGATTGATATGTGATTTTCAGAAAGATTCTCA  
a1-1\_ARK3-PUB8 -----TTATGTAATTGTTTATTGAGACAACCTTGTAATAGATCTGCAACAACAATGATTGGATTGATATGTGATTTTCAGAAAGATTCTCA

Identity

a4\_ARK3-PUB8 GACAACATATTGTTATAATTATGGCTATAAGAGACACGAACAAAACCTTTTGTAGTTAGATAAATAATTATTAACTACTTATTAATATAAAAAACAATTTAT  
a1-1\_ARK3-PUB8 GACAACATATTGTTATAATTATGGCTATAAGAGACACGAACAAAACCTTTTGTAGTTAGATAAATAATTATTAACTACTTATTAATATAAAAAACAATTTAT

Identity

a4\_ARK3-PUB8 TTAGTCATTATAAATTAGTTATATA TGGTATTATAACAACATGCTTTATATA TATTAAGTGACAATATCTAAAATGTTGGGATATCTAAAAGTGTGTATATA  
a1-1\_ARK3-PUB8 TTAGTCATTATAAATTAGTTATATA TGGTATTATAACAACATGCTTTATATA TATTAAGTGACAATATCTAAAATGTTGGGATATCTAAAAGTGTGTATATA

Identity

a4\_ARK3-PUB8 CTTAATAATCTTCCAAATTTGGATTAAACATTATTGTAGTCTTACC TAAGTTTGAACCAAAACAAAACAAAAGTCTATGCTTTAATGGAAGACGTGAATCATGTG  
a1-1\_ARK3-PUB8 CTTAATAATCTTCCAAATTTGGATTAAACATTATTGTAGTCTTACC TAAGTTTGAACCAAAACAAAACAAAAGTCTATGCTTTAATGGAAGACGTGAATCATGTG

Identity

a4\_ARK3-PUB8 ATGTGCCTAAATCTTGA CCAAAAAAAAAGTCAACGAATATTCAGTAAAAAAAATAGGGGTTGTTATTGAATTTAGATTATTATAGTTTAAATGATT  
a1-1\_ARK3-PUB8 ATGTGCCTAAATCTTGA CCAAAAAAAAAGTCAACGAATATTCAGTAAAAAAAATAGGGGTTGTTATTGAATTTAGATTATTATAGTTTAAATGATT

Identity

a4\_ARK3-PUB8 TAAATGTTAAGA TGTATTTGAAATACTATCTACAAGTTGGTATTTGATTACACATGTTTAAAAAAAATAATACATTCAAATCCAAATCTAAATAAACCAATCA  
a1-1\_ARK3-PUB8 TAAATGTTAAGA TGTATTTGAAATACTATCTACAAGTTGGTATTTGATTACACATGTTTAAAAAAAATAATACATTCAAATCCAAATCTAAATAAACCAATCA

Identity

a4\_ARK3-PUB8 ACATGGAATA TACTTATTTAATG TATTTTAAATCAACAAATAATATCTAAATCAATAACAGTGTATTTATTTTACTTTTAAATACATAA TTAATAA-  
a1-1\_ARK3-PUB8 ACATGGAATA TACTTATTTAATG TATTTTAAATCAACAAATAATATCTAAATCAATAACAGTGTATTTATTTTACTTTTAAATACATAA TTAATAA-

Identity

a4\_ARK3-PUB8 -----ATTTTATTTGATT TTAATAA TACAAAA TTAATCA TTAATAA TCAAAAAATTAATAAT CCCATCTTAAAGTTCTAGAAAAGGTGTATCTTTGTACCCAAA  
a1-1\_ARK3-PUB8 ACATGATTCA TTTGATT TTAATAA TACAAAA TTAATCA TTAATAA TCAAAAAATTAATAAT CCCATCTTAAAGTTCTAGAAAAGGTGTATCTTTGTACCCAAA

Identity

a4\_ARK3-PUB8 ATACCCTCGACCGTACGT CACGAAACAAAAGGCTAATTTCGTCATCTCAACAACAAAGCCATTGCTGCAAAAAGCTTCACGGTCTACGAACCACCCTATCTCT  
a1-1\_ARK3-PUB8 ATACCCTCGACCGTACGT CACGAAACAAAAGGCTAATTTCGTCATCTCAACAACAAAGCCATTGCTGCAAAAAGCTTCACGGTCTACGAACCACCCTATCTCT

Identity

a4\_ARK3-PUB8 CTCTTTTATGTTTATC TGCTCTGTTCTTACAGGAATCTTATAACCCTTGTCTCTCTGCTCTTTGAGTTCTAATCTTATCTGTTTCTCATTTGACACTTT  
a1-1\_ARK3-PUB8 CTCTTTTATGTTTATC TGCTCTGTTCTTACAGGAATCTTATAACCCTTGTCTCTCTGCTCTTTGAGTTCTAATCTTATCTGTTTCTCATTTGACACTTT

Identity

a4\_ARK3-PUB8 TAAAAGTTTCAAGTAGGAGATGGCCTTTGAGTTACCAACAGATTTT CAGATGCCCTATCTCTCTTGTAGATTATGTCTGACCCGTGTTATATCCAATCGGGTCATA  
a1-1\_ARK3-PUB8 TAAAAGTTTCAAGTAGGAGATGGCCTTTGAGTTACCAACAGATTTT CAGATGCCCTATCTCTCTTGTAGATTATGTCTGACCCGTGTTATATCCAATCGGGTCATA

Identity

a4\_ARK3-PUB8 CTTTTCGATCGGCTCTTCA TCCAACGCTGGATTGACTCCGTAATCGAATGCTCAATCACCAAGCTCCCTTTATCAGAAAAACCTTCTTTAATCCCTAATCATG  
a1-1\_ARK3-PUB8 CTTTTCGATCGGCTCTTCA TCCAACGCTGGATTGACTCCGTAATCGAATGCTCAATCACCAAGCTCCCTTTATCAGAAAAACCTTCTTTAATCCCTAATCATG

Identity

a4\_ARK3-PUB8 CTCTCCGCACTTAAATTTCTAATTTGCTCATG  
a1-1\_ARK3-PUB8 CTCTCCGCACTTAAATTTCTAATTTGCTCATG
