# Supplementary material for: Secondary Evolution of a Self-Incompatibility Locus in the Brassicaceae Genus Leavenworthia
Source: PubMed Central journal article supplement (PMC3653793; doi:10.1371/journal.pbio.1001560), 2013-05-14

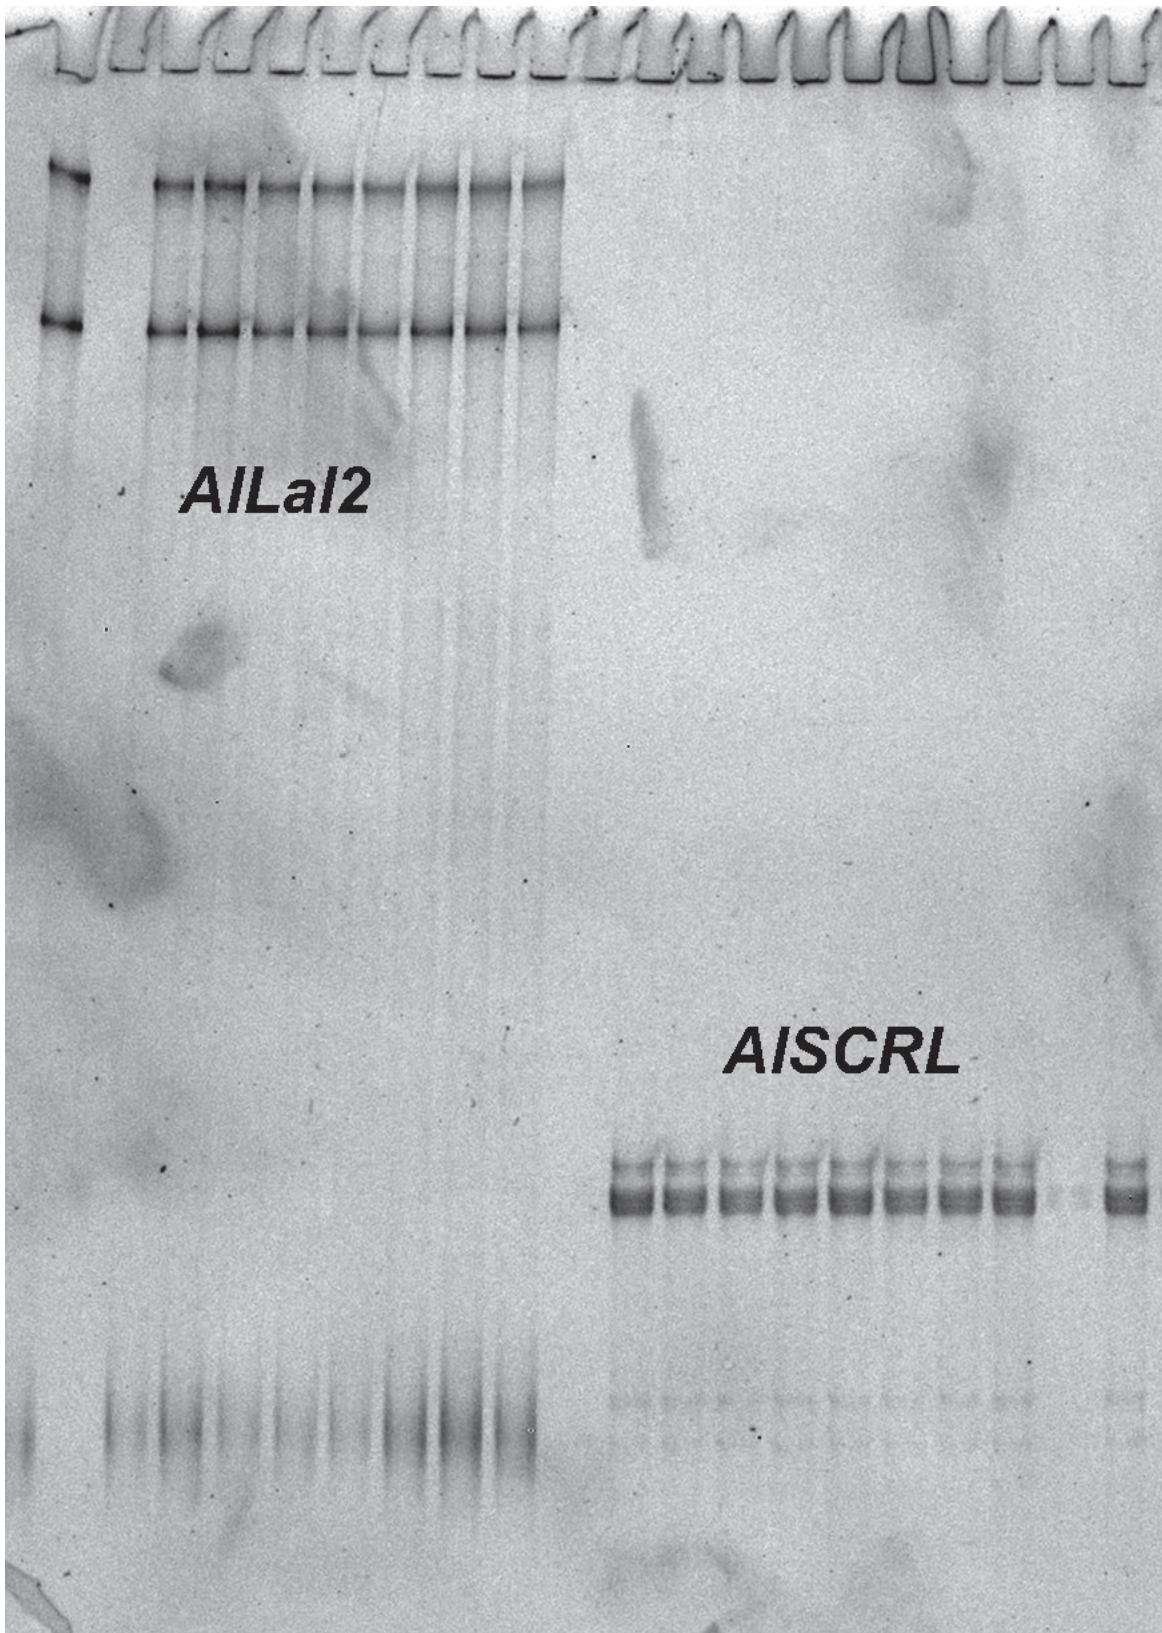

Supplement: pbio.1001560.s006.pdf [file pbio.1001560.s006.pdf]
