# Supplementary material for: Secondary Evolution of a Self-Incompatibility Locus in the Brassicaceae Genus Leavenworthia
Source: PubMed Central journal article supplement (PMC3653793; doi:10.1371/journal.pbio.1001560), 2013-05-14
Supplement: pbio.1001560.s007.pdf [file pbio.1001560.s007.pdf]

```

1       10      20      30      40      50      60      70      80      90
a2_Lal2 MTHNNSYTF FFLFLVLSFI LRMSI NGFSLTARESV KLSEDTRNIV SPGEI FEMGLFKAATS LTDI DGWYLG IWKQLPRIVV IANRD

Identity
100     110     120     130     140     150     160     170     180
a2_Lal2 SHLSNSTAT LKMSNTN LFLHDDQ SGR TVWNTN LI NQI NEETLVA ELLDN GN FV LKYSN GKS S L W Q S F D Y P T D T L L P G M K L G L D R T K N L N K
a1-2_Lal2                                         KLGLDR TKNL N K

Identity
190     200     210     220     230     240     250     260     270
a2_Lal2 TLTAWASLY DPSSGS YVFKI ENWKV SHGLLYDTGQI DSRTGPSYS NIVNI TETEEEEI SHSLNI TTNV GSI SLLQMM YTGSLQLLEFI GGE
a1-2_Lal2 TLTAWASLY DPSSGS YVFKI ENWKV SHGLLYDTGQI DSRTGPSYS NIVNI TETEEEEI SHSLNI TTNV GSI SLLQMM YTGSLQLLEFI GGE

Identity
280     290     300     310     320     330     340     350     360
a2_Lal2 RHL LFHFPDGT CDFYNT CGYNTY CNTSSNCECI PGFQPGGQYAWGLTKSKPR CVRNLQLSCQEREFKKIRNMKLPDTEYAIV DTKV GLEE
a1-2_Lal2 RHL LFHFPDGT CDFYNT CGYNTY CNTSSNCECI PGFQPGGQYAWGLTKSKPR CVRNLQLSCQEREFKKIRNMKLPDTEYAIV DTKV GLEE

Identity
370     380     390     400     410     420     430     440     450
a2_Lal2 CEKRC LMNCNCTA FANI DMRNGGSDCVMW TGDLLDMR SYNNT EGQDLYV KLPAEDLGGKKNI NTII GSVI GGLGLFSLLCYWLVI TRNRS
a1-2_Lal2 CEKRC LMNCNCTA FANI DMRNGGSDCVMW TGDLLDMR SYNNT EGQDLYV KLPAEDLGGKKNI NTII GSVI GGLGLFSLLCYWLVI TRNRS

Identity
460     470     480     490     500     510     520     530     540
a2_Lal2 RSNSQETSQ TI EDWGS I CMDYDV IA TATENFSDSNTLGKGGFGTV YKQQLPDGQYI AVKKM TEMSQQGVEGFANEMKLIARV QHSNLIRL
a1-2_Lal2 RSNSQETSQ TI EDWGS I CMDYDV IA TATENFSDSNTLGKGGFGTV YKQQLPDGQYI AVKKM TEMSQQGVEGFANEMKLIARV QHSNLIRL

Identity
550     560     570     580     590     600     610     620     630
a2_Lal2 LGFCSTADHR LLVY EYI ENSSLD TYI FDTEQYV LNWEKR FEI I KGIV KGLI YLHQDSR FRI I HLDLKPNNI LLDKDMI PKI SDFGLAKI
a1-2_Lal2 LGFCSTADHR LLVY EYI ENSSLD TYI FDTEQYV LNWEKR FEI I KGIV KGLI YLHQDSR FRI I HLDLKPNNI LLDKDMI PKI SDFGLAKI

Identity
640     650     660     670     680     690     700     710     720
a2_Lal2 LEGNA TEGRA PTAVG TLGYI DPNYSKHNI YSAKSDV YSFGV LLEIV SGKRNMDFLNSFDGTSLLTHIWN SWSKGEVLEIVDPV LKIASL
a1-2_Lal2 LEGNA TEGHA PTAVG TLGYI DPNYSKHNI YSAKSDV YSFGV LLEIV SGKRNMDFLNSFDGTSLLTHIWN SWSKGEVLEIVDPV

Identity
730     740     750     760     770     780     790     797
a2_Lal2 TSLQAE EI LKCVHI GLLCV HELPEDR PTMSLV GSSLGKEV DFI DRPKPAEI GSKEAKGEA STV TSPQI TFSMDAR *

```
